# Supplementary material for: Band gap opening of graphene by forming a graphene/PtSe2 van der Waals heterojunction
Source: Royal Society of Chemistry journal article supplement (doi:10.1039/c7ra06865d), 2017-01-01
Supplement: c7ra06865d1.pdf [file c7ra06865d1.pdf]

## Supplemental Materials

### Band Gap Opening of Graphene by Forming Graphene/PtSe<sub>2</sub> van der Waals Heterojunction

Zhaoyong Guan,<sup>1,2\*</sup> Shuang Ni<sup>3</sup>, Shuanglin Hu<sup>1\*</sup>

<sup>1</sup>Institute of Nuclear Physics and Chemistry, China Academy of Engineering Physics, Mianyang, Sichuan 621900, P. R. China

<sup>2</sup>Department of Physics and State Key Laboratory of Low-Dimensional Quantum Physics, Tsinghua University, Beijing 100084, P. R. China

<sup>3</sup>Research Center of Laser Fusion, China Academy of Engineering Physics, Mianyang, Sichuan 621900, P. R. China

\*Electronic address: [guanzyhaoyong@gmail.com](mailto:guanzyhaoyong@gmail.com)  
[hushuanglin@caep.cn](mailto:hushuanglin@caep.cn)

1. We use *CellMatch* program to investigate the stacking orders of graphene and PtSe<sub>2</sub> layers. We consider the following stacking orders: Index-1 (378 atoms,  $a = 81.45 \text{ \AA}$ ,  $b = 7.49 \text{ \AA}$ ), Index-2 (348 atoms,  $a = 74.66 \text{ \AA}$ ,  $b = 7.49 \text{ \AA}$ ), Index-3 (318 atoms,  $a = 68.17 \text{ \AA}$ ,  $b = 7.49 \text{ \AA}$ ), Index-4 (288 atoms,  $a = 61.68 \text{ \AA}$ ,  $b = 7.49 \text{ \AA}$ ), Index-5 (258 atoms,  $a = 55.20 \text{ \AA}$ ,  $b = 7.49 \text{ \AA}$ ) and Index-6 (30 atoms) as shown in Fig. S1, and the corresponding binding energy of very atom is -28.6, -28.2, -27.63, -27.82, -28.3 and -31.3 meV, respectively.

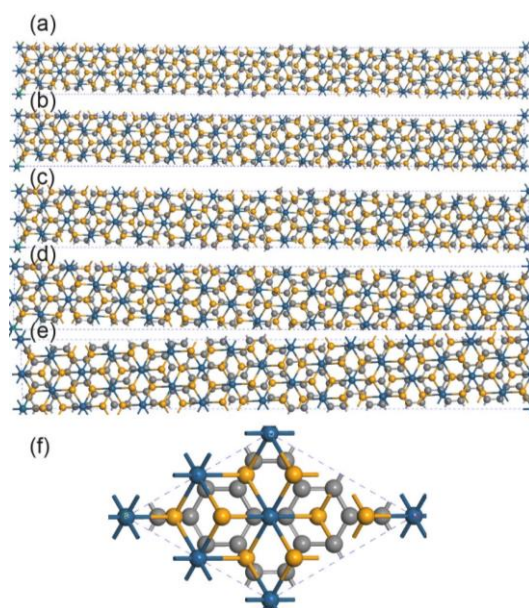

Figure. S1. The different stacking orders of the graphene/PtSe<sub>2</sub> heterojunction. The top view of the optimized geometries of (a) Index-1, (b) Index-2, (c) Index-3, (d) Index-4, (e) Index-5 and (f) Index-6.

For Index-1, 2, 3, 4, 5, the value of corresponding lattice constant is larger than 55.20 Å. Considering balance between computational cost and accuracy, we choose Index-6 as the model to accomplish our computation.

2. In order to get the lattice parameter of the graphene/PtSe<sub>2</sub> heterojunction, two strategies are used:
  - (1) Fully relaxing all ions, with the shape and volume of the cell are relaxed. The Energy cut off is set as high as 520 eV, and the corresponding estimated lattice parameter is 7.398 Å.
  - (2) We also scan the lattice, and get the relationship between the energy and the lattice. The energy and lattice follows the following relationship:

$$\text{Energy} = 1458.742 - 456.567x + 30.863x^2$$

Then we have gotten the optimized lattice is 7.397 Å. This can be understood by the high Young's modulus of the graphene. Compared with PtSe<sub>2</sub>, the graphene is much "harder". The optimized lattice parameter is close to the graphene (2.460 Å).

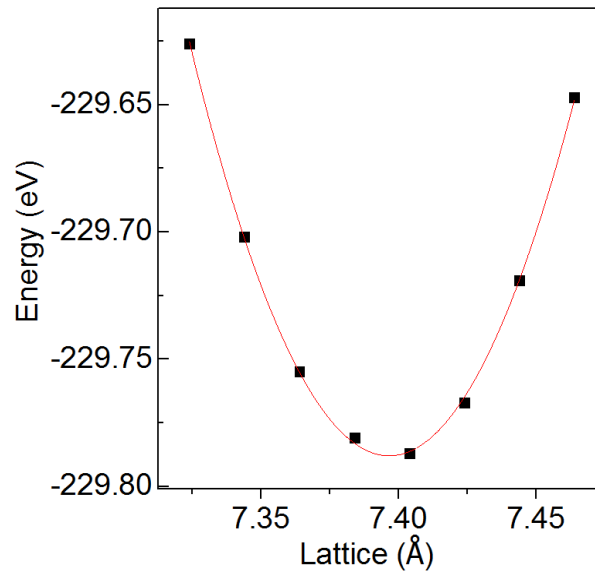

Figure S2: Variation of total energy with the lattice parameter. The red line is fitted with the quadratic function.

3. The partial density of the states PtSe<sub>2</sub> monolayer calculated by HSE06 functional. From Figure S3, we can find which atom orbitals make contribution to the VBM and CBM, respectively.

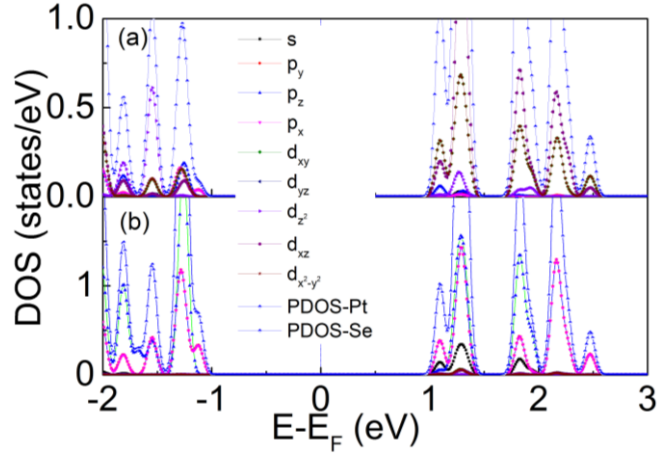

Figure S3: PDOS of the PtSe<sub>2</sub> monolayer calculated by HSE06, PDOS of (a) the Pt atoms, and (b) the Se atoms, respectively. The Fermi level ( $E_F$ ) was set to 0 eV.

- The accuracy of the HSE06 is concerned, so we have added the band structure of the free standing graphene under HSE06 functional. The adopted supercell is hexangular cell. So the Dirac cone locates at K point.

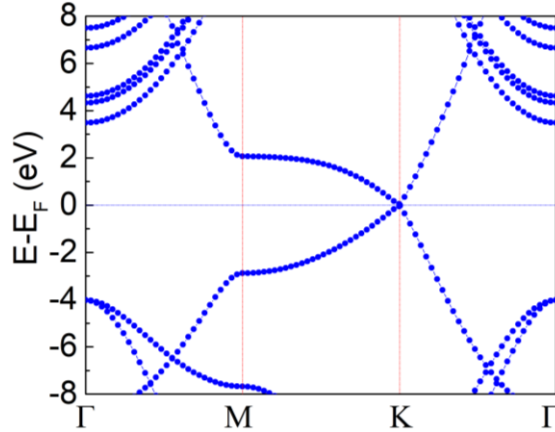

Figure S4: The band structure of the graphene supercell is calculated under HSE06 functional. The  $\Gamma$ , M, K points are  $(0, 0, 0)$ ,  $(0, 1/2, 0)$ , and  $(1/3, 1/3, 0)$ , respectively.

- The band structure of the graphene/PtSe<sub>2</sub> heterojunction is also calculated by DFT-D3 method of Grimme and self-consistent vdW. The optimized distance between graphene and PtSe<sub>2</sub> is about 3.31, and 3.30 Å, respectively. And the band structure of graphene/PtSe<sub>2</sub> heterojunction calculated by DFT-D3 is shown in Figure S5, and the corresponding band gap is 0.036 eV.

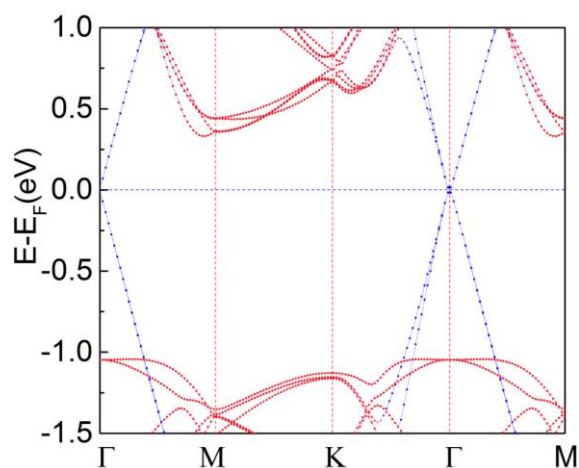

Figure S5: The band structure of the graphene/PtSe<sub>2</sub> heterojunction is calculated by DFT-D3. The size of the red and blue dots represent the weights of PtSe<sub>2</sub> and graphene, respectively. The  $\Gamma$ , M, K presents  $(0, 0, 0)$ ,  $(0, 1/2, 0)$ , and  $(1/3, 1/3, 0)$ , respectively.

6. We also calculate the charge transfer by integrating the differential charge density to get the total charge transfer, and there is about 0.07  $e$  charge transferring from PtSe<sub>2</sub> to graphene layer.

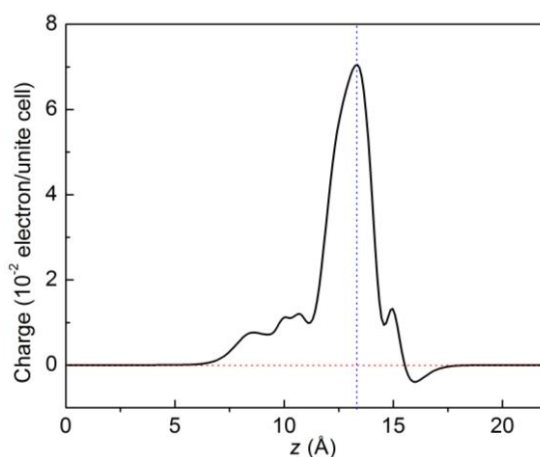

Figure S6: Integrated differential electron density of the graphene/PtSe<sub>2</sub> heterojunction.

7. In order to study the character of the states near the fermi-level, we calculate the projected band of the graphene/PtSe<sub>2</sub> heterojunction. The states near the fermi-level are mainly consist of  $p_z$  orbital of the graphene.

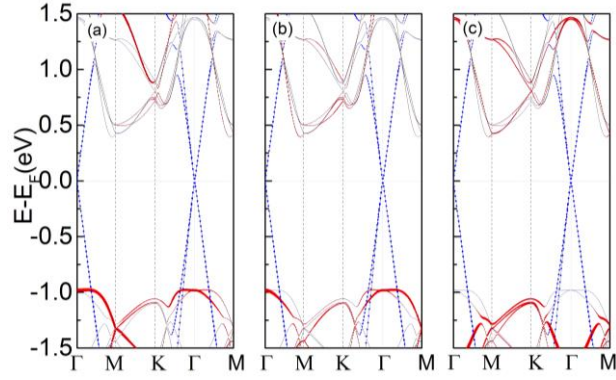

Figure S7: The projected band of the Graphene/PtSe<sub>2</sub> heterojunction, p<sub>z</sub> orbital of the graphene and (a) p<sub>x</sub> orbital of the PtSe<sub>2</sub>, (b) p<sub>y</sub> orbital of the PtSe<sub>2</sub>, and (c) p<sub>z</sub> orbital of the PtSe<sub>2</sub>. The blue and red line presents contribution of the p<sub>z</sub> orbital of the graphene and each p orbital of the PtSe<sub>2</sub>, respectively.

8. We also calculate the band structure of the graphene/PtSe<sub>2</sub> heterojunction by DFT-D3 method of Grimme changing with the vertical strains. The E<sub>gap</sub> under PBE as a function of strain is found to follow an exponential relationship:

$$E_g = -0.002 + 0.033 \times \exp(2.146\varepsilon) \text{ (PBE)}$$

$$E_g = 0.176 + 0.073 \times \exp(1.630\varepsilon) \text{ (HSE06)}$$

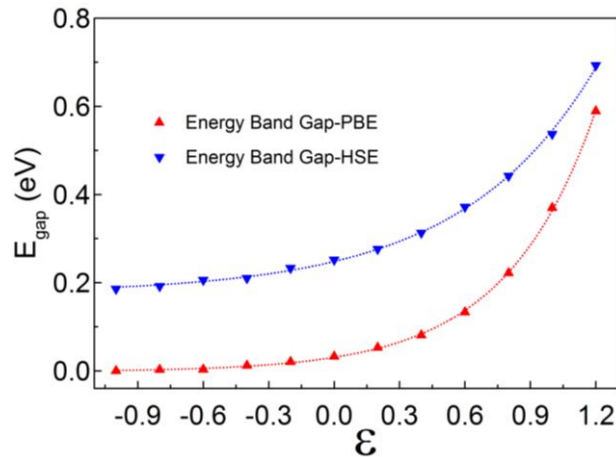

Figure S8: The energy gap of the graphene/PtSe<sub>2</sub> heterojunction calculated by DFT-D3 method of Grimme is as function of the vertical strains. The red and blue dots present the fitted exponential curves calculated by PBE and HSE06, respectively.

9. For the bigger compressive vertical strains, the effect of spin-orbit coupling (SOC) on the energy band gap becomes important. Especially at quite large strain, such as  $\mathcal{E} = 1.0, 1.2 \text{ \AA}$ , both CBMs of the heterojunctions lie at  $\Gamma$  point, while the VBM transfers from the  $\Gamma$  point to the K point, for the strong mutual interaction between PtSe<sub>2</sub> and graphene and enhancement of the SOC. So we calculate the band structure with HSE06 including SOC effect. For  $\mathcal{E} = 0.8, 1.0, \text{ and } 1.2 \text{ \AA}$ , the corresponding  $E_{\text{gap}}$  at  $\Gamma$  point is 0.449, 0.617 and 0.850 eV, respectively.

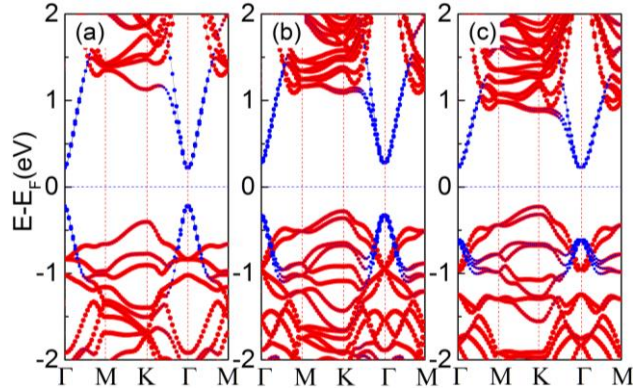

Figure S9: The band structure of the graphene/PtSe<sub>2</sub> heterojunction with HSE06 plus SOC. The band structure with vertical  $\mathcal{E}$  (a) 0.8, (b) 1.0, and (c) 1.2  $\text{\AA}$ , respectively.
